# Supplementary material for: Near-infrared light-actuated on-demand botanicals release and hyperthermia by an antibiotic-free polysaccharide-based hydrogel dressing for the synergistic treatment of wound infections
Source: Royal Society of Chemistry journal article supplement (doi:10.1039/d3tb02714g), 2024-01-01
Supplement: d3tb02714g1.pdf [file d3tb02714g1.pdf]

**Near-infrared light-actuated on-demand botanicals release  
and hyperthermia by an antibiotic-free polysaccharide-  
based hydrogel dressing for the synergistic treatment of  
wound infections**

Shuwen Sun,<sup>a</sup> Wenbo Lin,<sup>a</sup> Lu Yang,<sup>a</sup> Chenhao Zhang,<sup>a</sup> Hong Kan,<sup>a,b</sup>

Chen Xu<sup>a,b\*</sup> Kai Dong,<sup>a,b\*</sup>

<sup>a</sup> College of Chinese Medicinal Materials, Jilin Agricultural University, Changchun 130118, China

<sup>b</sup> National & Local Joint Engineering Research Center for Ginseng Breeding and Development, Changchun 130118, China

\*Corresponding Author: Chen Xu (E-mail: [xuchen@jlau.edu.cn](mailto:xuchen@jlau.edu.cn));

Kai Dong ([dongkai@jlau.edu.cn](mailto:dongkai@jlau.edu.cn))

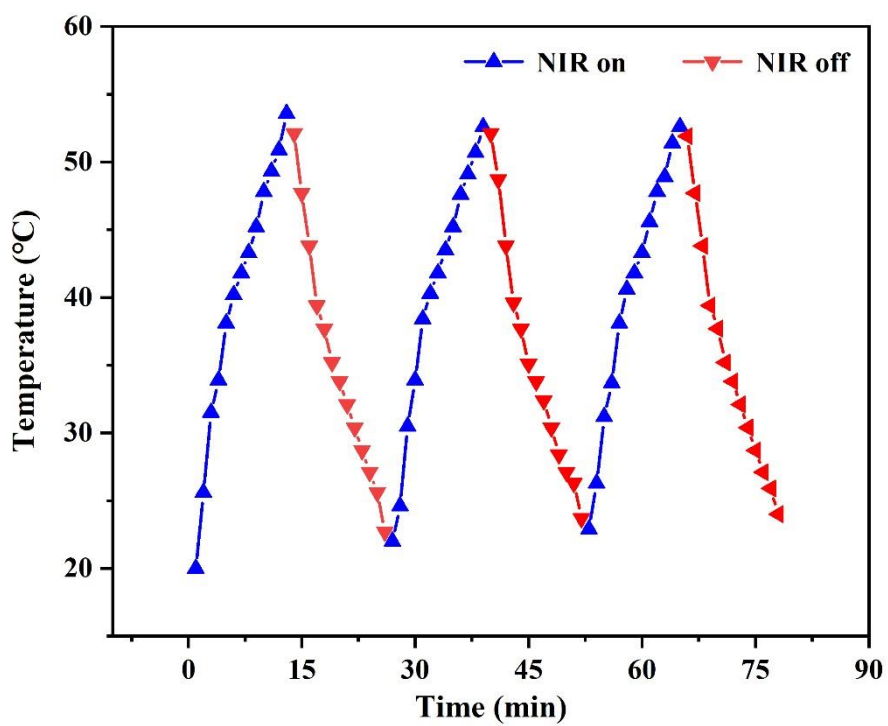

**Fig.S1.** The recycling heating profile of ATB hydrogel under NIR light irradiation ( $1 \text{ W}\cdot\text{cm}^{-2}$ ) for three on/off cycles.
